# Supplementary material for: Sleep and Core Body Temperature Alterations Induced by Space Radiation in Rats
Source: MDPI journal article supplement (doi:10.3390/life13041002), 2023-04-13

**Table 1. Select sleep parameters comparing non-shipped (Control) and shipped (Sham) rats.** Data are mean  $\pm$  SEM presented as 20 h totals. There were no significant differences across groups.

| Parameter        | Control          | Sham             |
|------------------|------------------|------------------|
| Total Sleep Time | 543.4 $\pm$ 7.6  | 559.1 $\pm$ 18.9 |
| Total NREM sleep | 487.2 $\pm$ 10.3 | 459.9 $\pm$ 12.5 |
| Total REM sleep  | 78.1 $\pm$ 7.0   | 80.4 $\pm$ 15.7  |

**Figure 1. Number of Control and Sham animals that reached criterion performance during balance beam testing.** Criterion for successful learning was determined by an individual animal reaching the goal box starting from the farthest position.

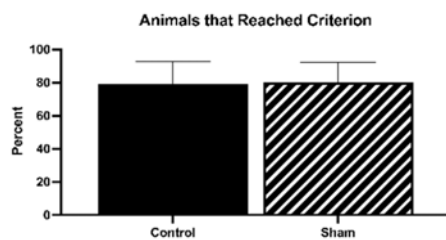

**Figure 2. Success rates for Control and Sham groups after an animal had successfully met Criterion performance on the balance beam.** Percent success was calculated for the animals within a group that reached criterion based on the number of successful trails from the farthest position over the total number of trials attempted at that position (%Success = # of Successful Trials at Criterion/Total # of Trials at Criterion  $\times$  100). The difference between groups was not significant ( $p=.07$ ).

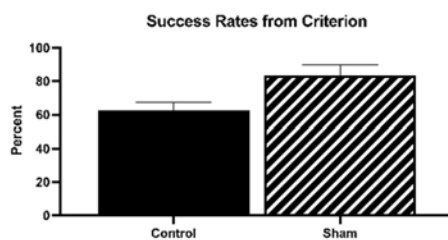

Supplement: s1 [file s1]
